# Supplementary material for: Interrelationships of Chemical, Physical and Biological Soil Health Indicators in Beef-Pastures of Southern Piedmont, Georgia
Source: MDPI journal article supplement (doi:10.3390/su13094844), 2021-04-26
Supplement: s1 [file s1]

## Supplementary Materials

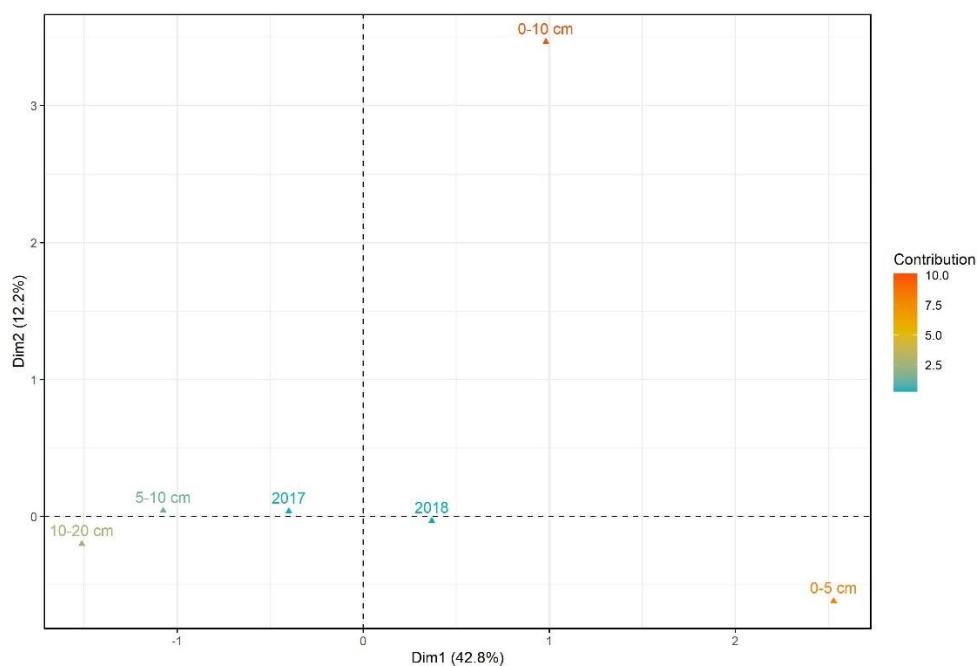

**Figure S1.** Principal Component Analysis of variables showing contribution of qualitative variables in the first and second principal components. Dim1 = First principal component, Dim2 = second principal component. Contribution is the relative contribution of variables in each principal component.

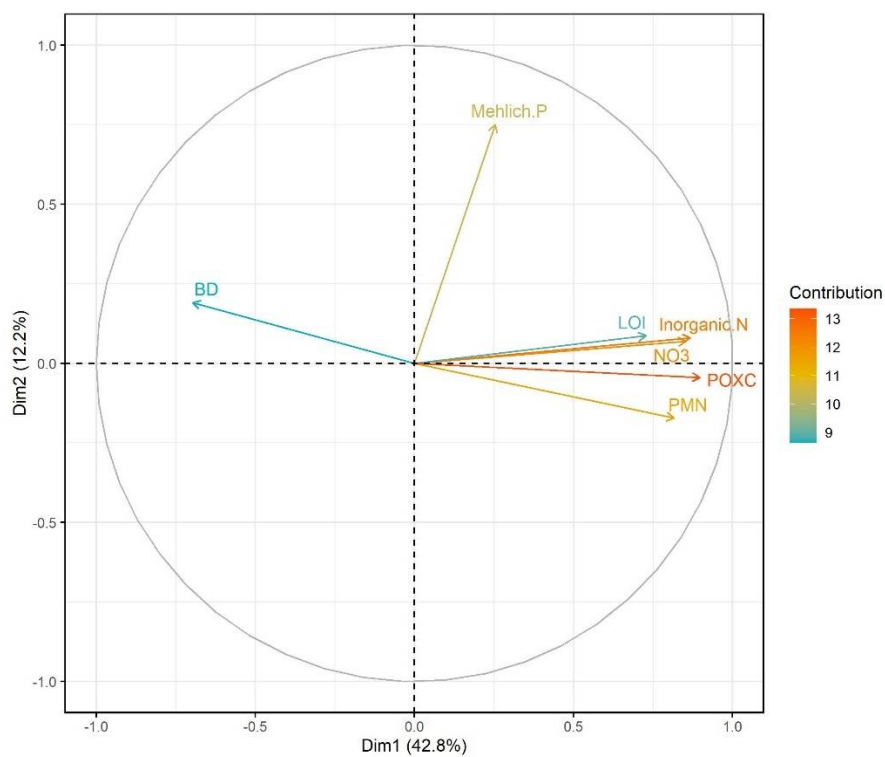

**Figure S2.** Principal Component Analysis of variables showing contribution of quantitative variables in the first and second principal components. Dim1 = First principal component, Dim2 = second principal component. Contribution is the relative contribution of variables in each principal component.

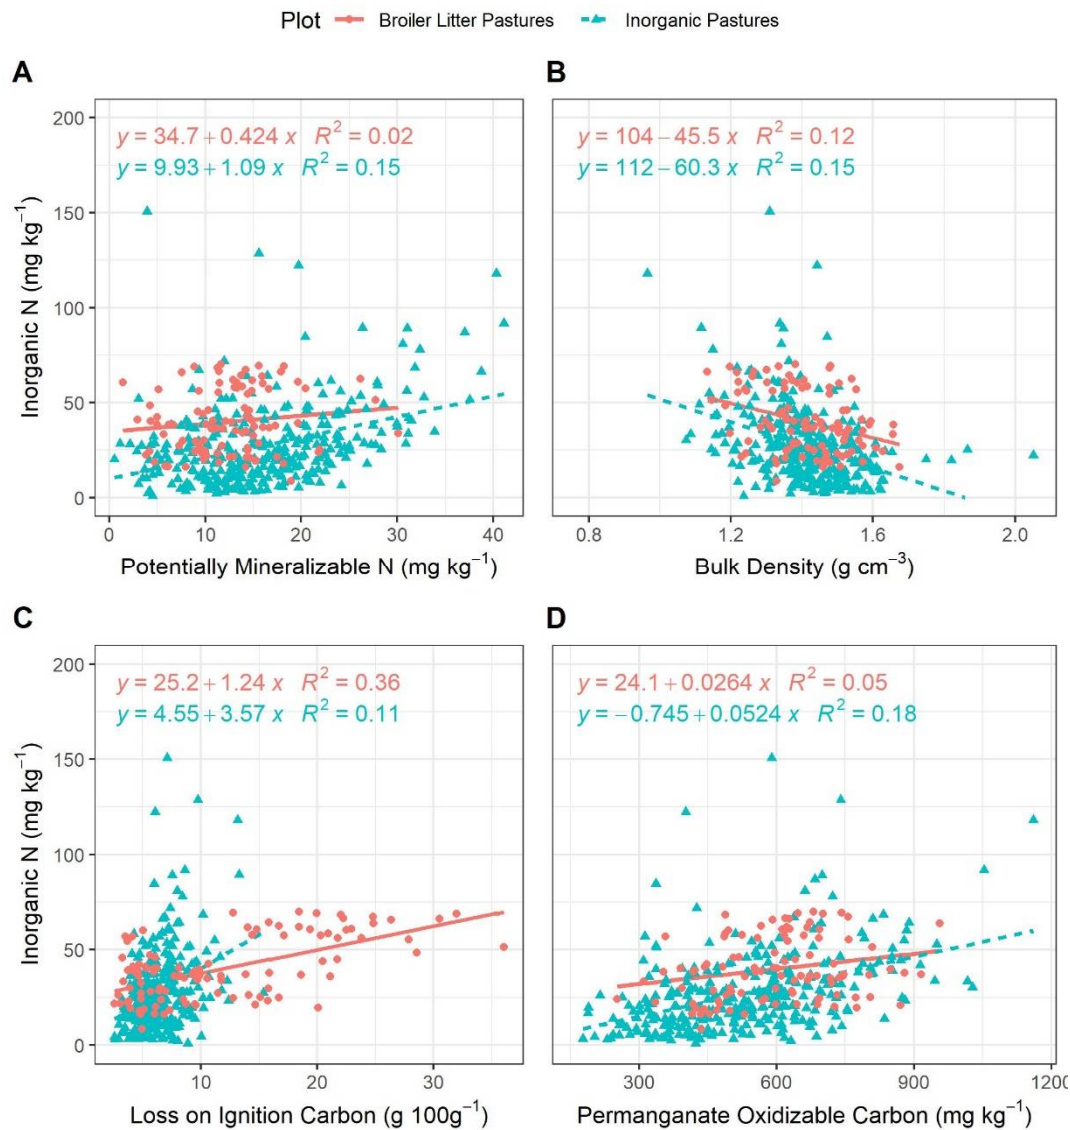

**Figure S3.** Relationship of inorganic N with (A) potentially mineralizable N, (B) bulk density, (C) loss on ignition carbon, and (D) active carbon. The black circles represent soils from the broiler litter applied pastures, and the triangles represent the inorganic pastures. This data only shows data from 0-10 cm soil depths for both systems.

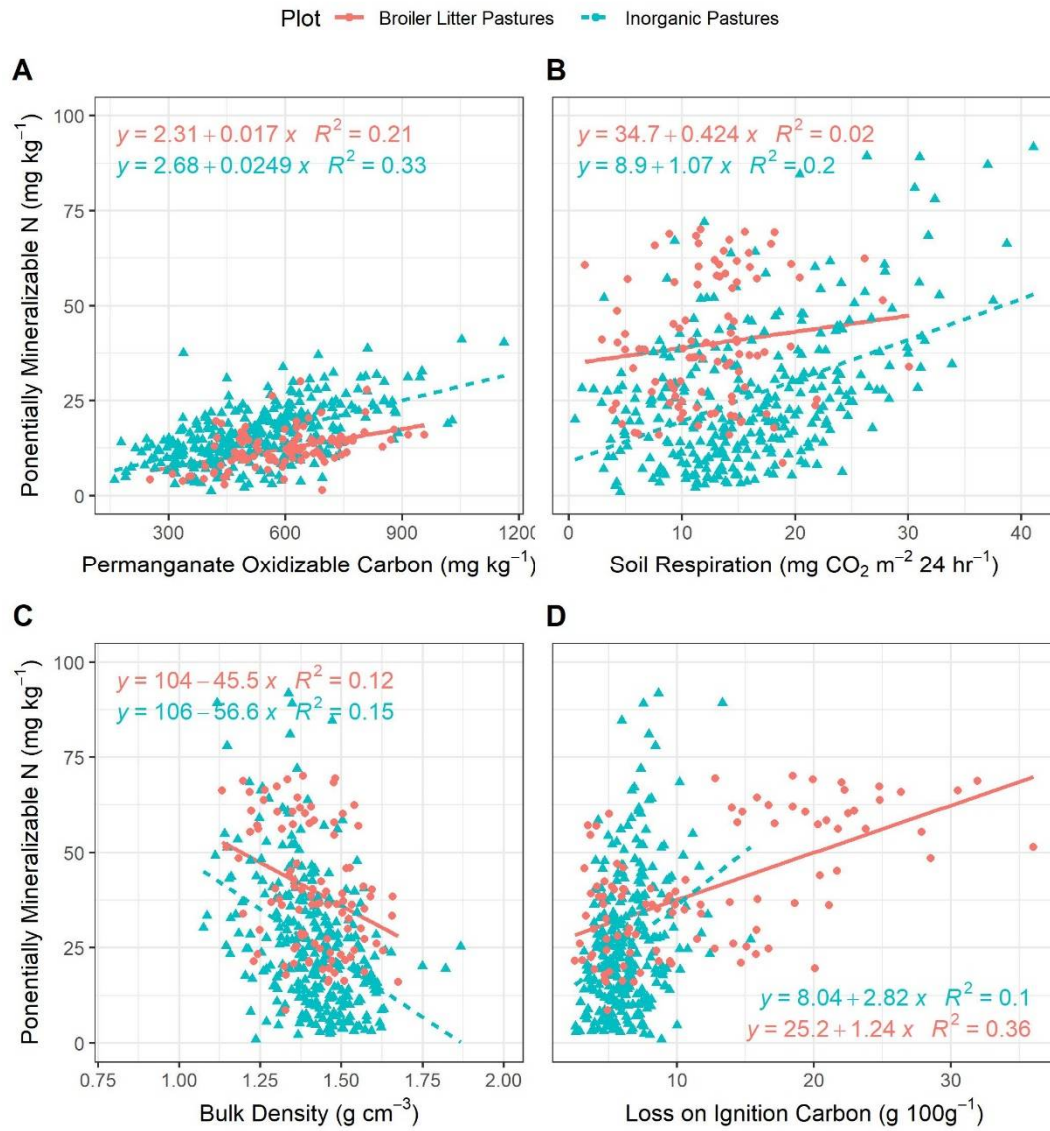

**Figure S4.** Relationship of potentially mineralizable N with (A) active carbon, (B) soil respiration, (C) bulk density, and (D) loss on ignition carbon. The black circles represent soils from the broiler litter applied pastures, and the triangles represent the inorganic pastures. This data only shows data from 0-10 cm soil depths for both systems.

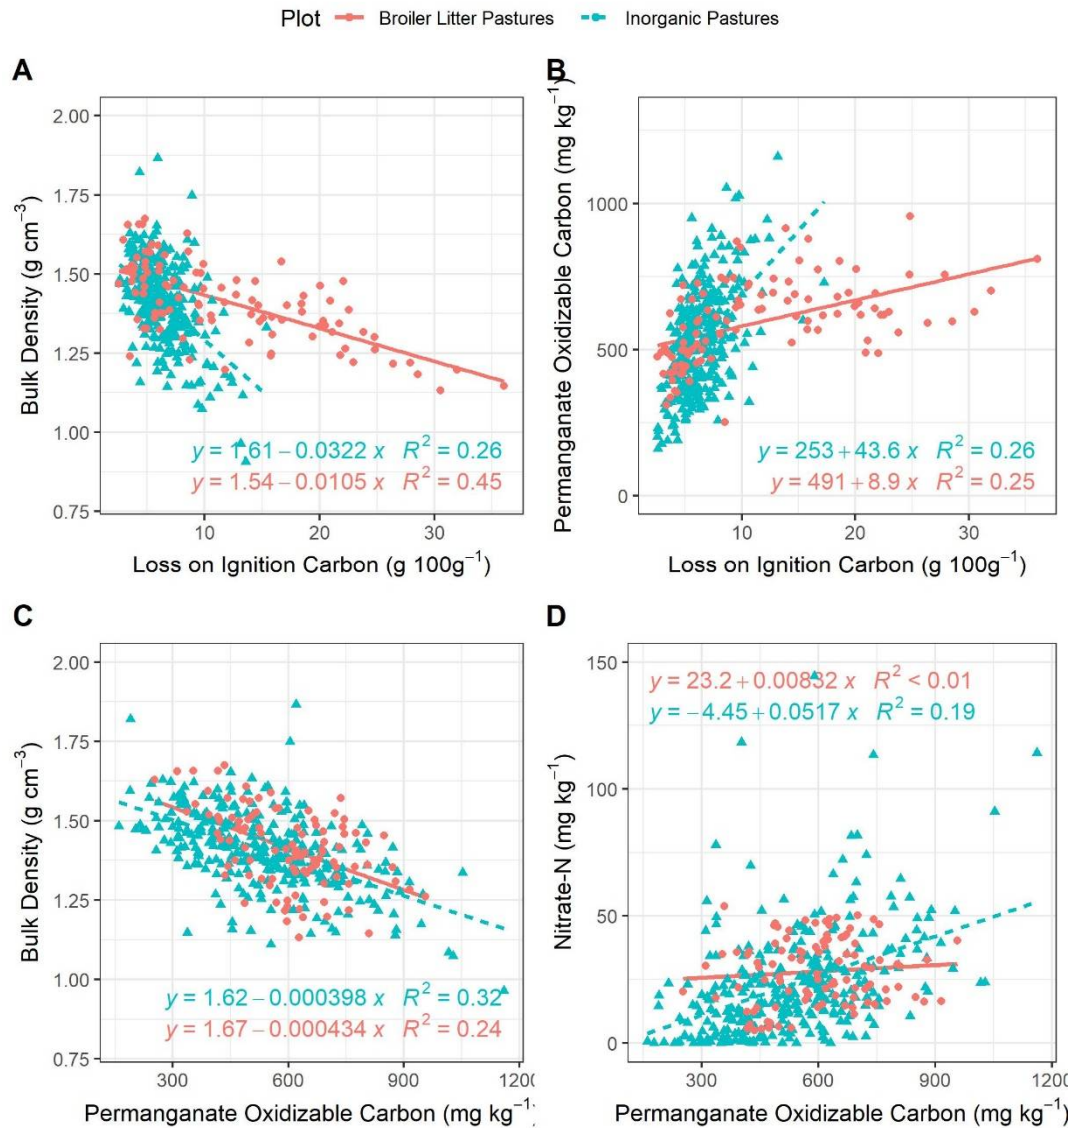

**Figure S5.** Relationships of loss on ignition carbon with (A) bulk density and (B) active carbon, and relationship of active carbon with (C) bulk density, and (D) nitrate-nitrogen. The black circles represent soils from the broiler litter applied pastures, and the triangles represent the inorganic pastures. This data only shows data from 0-10 cm soil depths for both systems.
